# Supplementary material for: A new approach for obtaining ceramic NASICON (Na3Zr2Si2PO12) films sintered in situ by a sol–gel method, using spray deposition and near-infra red sintering
Source: Royal Society of Chemistry journal article supplement (doi:10.1039/d4ta05747c), 2024-01-01
Supplement: d4ta05747c1.pdf [file d4ta05747c1.pdf]

## Supporting Information

### New approach for obtaining ceramic NASICON ( $\text{Na}_3\text{Zr}_2\text{Si}_2\text{PO}_{12}$ ) films sintered in situ by a sol-gel method, using spray deposition and Near-Infra Red Sintering

Rafael Marti Valls,<sup>a\*</sup> Rebecca Griffin,<sup>a,b\*</sup> Anne Sawhney,<sup>a</sup> Celina Domingos-Dlofo,<sup>a</sup> Tom Dunlop,<sup>a</sup> Sam Reis<sup>a</sup>, Peter Holliman<sup>a</sup>, Jenny Baker,<sup>a,b</sup>

<sup>a</sup>Faculty of Science and Engineering, Swansea University, Bay Campus, Swansea, UK

<sup>b</sup>Faculty of Engineering and Design, University of Bath, BA2 7AY, UK

\*Contributed the same to the communication authorship

### Supporting Figures

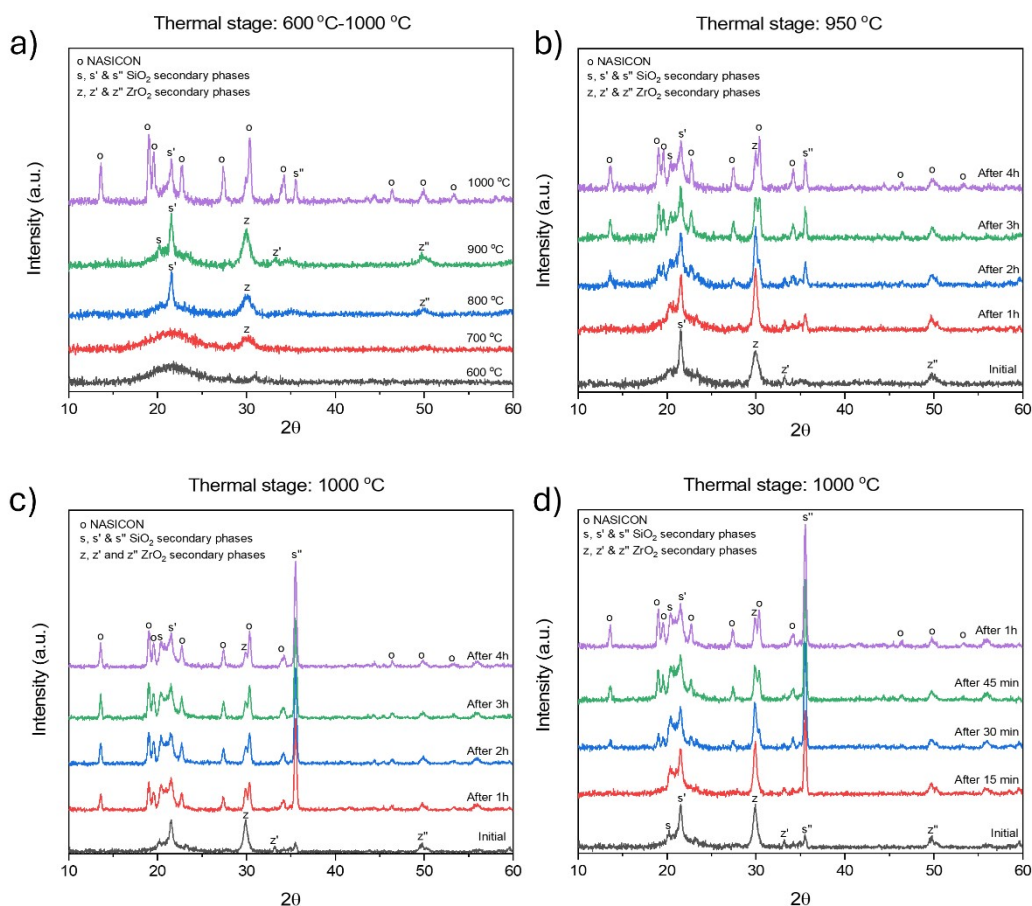

Figure S1.- Thermal stage XRD of NASICON sample sintered: a) between 600-1000 °C, b) at 950 °C (measurement per hour), c) at 1000 °C (measurement per hour), d) at 1000 °C (measurement per 15 min)

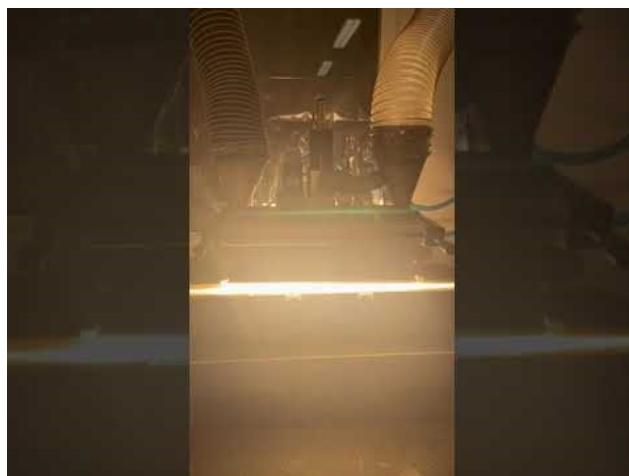

Figure S2.- Video of NASICON film NIR sintered

### Characterisation Equipment

The crystallinity of the powders and films sintered was analysed by X-Ray Diffraction (Bruker D8 Discover XRD) using Cu K $\alpha$  radiation source ( $\lambda = 1.5406 \text{ \AA}$ , angle range  $2\theta = 10\text{--}60^\circ$ ). Glancing Incidence XRD (GI-XRD) was measured in a true parallel beam mode using a Goebel mirror optic and axial soller system with incidence angle fixed between  $0.5^\circ$  and  $4.5^\circ$  to control interaction depth. Thermal XRD tests were carried out using a DHS 1100 (Anton-Paar) mounted onto the D8 Discover. For each temperature step samples were heated at a rate of  $5^\circ\text{C}/\text{min}$  and held for 10 minutes to allow stabilisation. The measurements were undertaken with a point source and polycapillary optic and a 2mm collimator. Thermogravimetric Analysis and Differential Scanning Calorimetry in air (TGA/DSC) was used to analyse the dried sol (Setaram Labsys Evo (STA), temperature range  $25\text{--}1200 \text{ }^\circ\text{C}$ ). The irradiance spectrum was obtained from a AdPhos NIR Coil Lab LV2 unit. This equipment uses lamps similar to the ones in the adphosNIR<sup>®</sup>  $6 \times 6 \text{ kW}$  ceramic based NIR machine. To perform the measurement two portable Ocean Optics spectrometers were used, an HR2000+ UV/VIS (range  $200\text{--}1100 \text{ nm}$ ) and NIRQUEST256 NIR (range  $900\text{--}2500 \text{ nm}$ ); the input fibre with cosine corrector was positioned 5 cm away and 10 cm above the exit of the lamps to avoid thermal damage and data was collected for each power setting at 1 m/min speed (25 s exposure). UV/visible/NIR spectroscopy (Perkin Elmer UV-Vis-NIR spectrometer) was used to measure the NIR absorbance of the fused silica substrate, and the different films prepared (wavelength range  $\lambda = 500\text{--}2000 \text{ nm}$ ). The morphology of the NASICON films (oven and NIR sintered) was analysed by scanning electron microscopy (SEM, JEOL 7800F FEG-SEM). Raman spectroscopy analysis of films was performed with a Renishaw inVia Raman microscope using a laser with an excitation wavelength of  $532 \text{ nm}$  ( $\sim 3 \text{ mW}$ ). 25mm diameter fused silica discs with the spray coated NASICON films on top were masked with platinum and then coated with silver to serve as the contact (Figure S3).

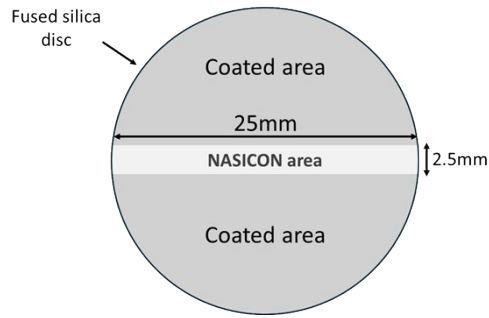

Figure S3.- Plan View of NASICON film on fused silica disc Pt-sputtered and Ag-coated

Ionic resistivity (R) was measured at room temperature and open circuit using a Gamry 620 potentiostat with a frequency between 1Hz and 3MHz at an amplitude of 10mV.

$$\sigma = \frac{t}{A \times R} \quad (1)$$

The ionic conductivity ( $\sigma$ ) was calculated using equation 1, with the film thickness (t) estimated by SEM images at 10 microns for both the oven and NIR sintered films. A is the cross-sectional area (film thickness x diameter of disc):

$$A = 10 \mu\text{m} \times 2.5 \text{ cm} = 1 \times 10^{-4} \text{ cm} \times 2.5 \text{ cm} = 2.5 \times 10^{-4} \text{ cm}^2$$
